# Supplementary material
Source: publisher site journal article supplement (https://www.dovepress.com/get_supplementary_file.php?f=458156.docx)
Supplement: Supplementary file 1 [file get_supplementary_file.php]

| **Appendix** Collected data by case | | | | | | | | | | |
| --- | --- | --- | --- | --- | --- | --- | --- | --- | --- | --- |
| **Publication date** | **Author** | **Case** | **Symptoms** | **Age at diagnosis (year)** | **Parity** | **Type of IUD** | **Time between placement and diagnosis (month)** | **Location of the IUD** | **Removal method** | **Complications/peculiarities** |
| 2010 | Abasiattai et al.(1) |  | metal thread from anus | 36 | 8 | Cu-IUD | 96 | rectum | local resection from rectum |  |
| 2019 | Al Sahaf et al.(2) |  | asymptomatic | 38 | 3 | Cu-IUD | 72 | rectum | coloscopy |  |
| 2022 | Aliukonis et al.(3) |  | abdominal pain | 41 | NS | NS | 120 | colon | laparoscopy | diagnosis during colonoscopy |
| 2020 | An et al.(4) |  | abdominal pain & vaginal blood loss | 63 | 1 | Cu-IUD | 444 | ovarian tumor | laparotomy |  |
| 2022 | Badu-Peprah et al.(5) |  | abdominal pain | 27 | 2 | NS | 24 | bladder & colon | laparotomy |  |
| 2011 | Banerjee et al.(6) |  | asymptomatic | 35 | NS | LNG-IUD | 36 | omentum | laparoscopy | partial omentectomy |
| 2008 | Behtash et al.(7) |  | vaginal blood loss | 29 | NS | NS | 36 | douglas | laparotomy | IUD inside hematoma in space of Douglas |
| 2021 | Benaguida et al.(8) |  | abdominal pain & irregular blood loss | 27 | 1 | NS | 18 | peritoneal collection | laparoscopy | abscess |
| 2010 | Bitterman et al.(9) |  | abdominal pain | 35 | 3 | Cu-IUD | 12 | colon | laparoscopy |  |
| 2022 | Boushehry et al.(10) |  | abdominal pain | 39 | 3 | Cu-IUD | 2 | rectum | laparoscopy + coloscopy | after difficult placement |
| 2014 | Bouzouba et al.(11) |  | asymptomatic | 49 | NS | NS | 240 | omentum | laparoscopy |  |
| 2011 | Bozkurt et al.(12) |  | abdominal pain | 41 | 7 | NS | 156 | serosa stomach | laparoscopy | one IUD in uterus and one IUD migrated |
| 2014 | Campobasso et al.(13) |  | recurrent cystitis | NS | 2 | Cu-IUD | 72 | bladder | laparoscopy | adhesion small intestine |
| 2011 | Carmody et al.(14) |  | abdominal pain | 25 | 1 | LNG-IUD | 3 | omentum | laparoscopy | multiple adhesions omentum |
| 2017 | Chai et al. (15) |  | abdominal pain and urinary complaints | 26 | NS | Cu-IUD | 1,5 | bladder | cystoscopy |  |
| 2021 | Chakir et al.(16) |  | abdominal pain and urinary complaints | 50 | 5 | NS | 180 | bladder | cystoscopy | lithiasis |
| 2011 | Chen et al.(17) |  | abdominal pain | 68 | 4 | NS | 360 | omentum & uterus | laparotomy | perforation of the colon |
| 2020 | Christodoulides et al. (18) |  | recurrent cystitis | 67 | 2 | NS | 240 | bladder | cystoscopy | lithiasis |
| 2010 | Chuang et al. (19) |  | abdominal pain and urinary complaints | 28 | 2 | NS | 36 | bladder | laparoscopy | lithiasis |
| 2017 | Claincy et al.(20) |  | suprapubic pain | 45 | 3 | LNG-IUD | 12 | wall of bladder | resection trough vaginal wall |  |
| 2020 | Dappa et al.(21) |  | abdominal pain | 55 | NS | NS | NS | bladder & vaginal wall | cystoscopy | caused hydronephrosis |
| 2011 | Dar et al.(22) |  | recurrent urinary tract infection – inability to void | 60 | 6 | NS | 240 | bladder | laparotomy | lithiasis |
| 2006 | Delotte et al.(23) |  | metal thread from anus | 31 | 3 | Cu-IUD | 96 | rectum | local resection from rectum |  |
| 2013 | Derrick et al.(24) |  | abdominal pain & vaginal blood loss | 37 | NS | NS | 0,75 | parametrium | laparoscopy |  |
| 2017 | DiPaola et al.(25) |  | asymptomatic | 51 | NS | NS | NS | rectum | coloscopy | incidental finding during screening for colon cancer |
| 2014 | Egkevist et al.(26) | 1 | asymptomatic | 36 | 1 | Cu-IUD | 144 | rectum | spontaneous expulsion from rectum |  |
|  |  | 2 | asymptomatic | 30 | 0 | LNG-IUD | 36 | douglas | laparoscopy |  |
| 2015 | Eichengreen et al.(27) |  | asymptomatic | 27 | 1 | Cu-IUD | 12 | rectum | rectoscopy |  |
| 2015 | Eli et al.(28) |  | abdominal pain | 37 | 6 | Cu-IUD | 0,25 | intra-abdominal | laparotomy |  |
| 2011 | Erian et al.(29) | 1 | asymptomatic | 44 | 2 | LNG-IUD | 15 | intra-abdominal | laparoscopy | adhesions omentum |
|  |  | 2 | abdominal pain | 19 | 0 | LNG-IUD | 0,75 | left diaphragm | laparoscopy |  |
| 2016 | Feghali et al.(30) |  | mictalgia | 31 | NS | NS | 48 | intravesical | laparoscopy |  |
| 2016 | Ferguson et al.(31) |  | abdominal pain | 46 |  | LNG-IUD | 24 | intra-abdominal | laparoscopy | gradual migration on earlier scans |
| 2015 | Foda et al.(32) |  | asymptomatic | 27 | 2 | Cu-IUD | 36 | abdominal wall | laparoscopy |  |
| 2018 | Ghayouri et al.(33) |  | abdominal pain and urinary complaints | 23 | 2 | Cu-IUD | 24 | bladder wall & omentum | laparoscopy | chronic pelvic pain |
| 2019 | Giampaolino et al.(34) |  | abdominal pain | 30 | 2 | Cu-IUD | 3 | left ovary | laparoscopy | pregnant |
| 2009 | Glass et al.(35) |  | asymptomatic | 31 | 4 | Cu-IUD | 108 | uterus & ileum | laparoscopy | Migration IUD during pregnancy – rupture of membranes after 19 weeks |
| 2018 | Goldbach et al.(36) |  | asymptomatic | 42 | 3 | Cu-IUD | 1 | tuba | laparoscopy |  |
| 2010 | Gonenc et al.(37) |  | abdominal pain & diarrhoea | 23 | 2 | NS | 12 | colon | coloscopy | placement 6 months postpartum |
| 2003 | Güngör et al.(38) |  | vaginal blood loss | 29 | 2 | Cu-IUD | 4 | sigmoid | laparoscopy | multiple adhesions |
| 2006 | Haouas et al.(39) | 1 | recurrent cystitis | 27 | 2 | NS | 36 | bladder | cystoscopy | lithiasis |
|  |  | 2 | urinary complaints | 43 | 6 | NS | 156 | bladder | cystoscopy | lithiasis |
| 2011 | Hewson et al.(40) |  | abdominal pain | 37 | NS | LNG-IUD | 36 | omentum | laparoscopy |  |
| 2004 | Hick et al.(41) |  | abdominal pain & urinary complaints | 31 | NS | NS | NS | bladder | cystoscopy | lithiasis |
| 2021 | Hoogstad et al.(42) |  | abdominal pain & vaginal blood loss | 35 | NS | Cu-IUD | 3 | appendix | laparoscopy |  |
| 2019 | Huang et al.(43) |  | abdominal pain | 26 | 1 | Cu-IUD | 48 | sigmoid | laparoscopy |  |
| 2012 | Huertas-Velasco et al.(44) |  | vaginal blood loss | 33 | 2 | Cu-IUD | 4 | rectum | coloscopy |  |
| 2008 | Istanbulluoglu et al.(45) | 1 | recurrent cystitis | 32 | 2 | Cu-IUD | 72 | bladder | cystoscopy |  |
|  |  | 2 | abdominal pain and abnormal discharge | 35 | 4 | NS | 168 | bladder & uterus | vaginal removal | one IUD in correct location, one IUD migrated |
| 2007 | Jaca et al.(46) | 1 | recurrent cystitis | 32 | NS | Cu-IUD | 36 | bladder | cystoscopy | lithiasis |
|  |  | 2 | abdominal pain & urinary complaints | 50 | NS | NS | 72 | bladder | cystoscopy | lithiasis |
| 2012 | Jeje et al.(47) |  | haematuria | 45 | 3 | NS | 240 | bladder | ng |  |
| 2019 | Jievaltienė et al.(48) |  | asymptomatic | 41 | 2 | Cu-IUD | 18 | bladder | laparotomy | incidental finding during caesarean section |
| 2014 | Jones et al.(49) |  | abdominal pain, nausea, vomitus | 24 | NS | NS | 18 | small intestine | ng | small bowel obstruction |
| 2018 | Kaleem et al.(50) |  | abdominal pain and abnormal defecation pattern | 30 | NS | NS | 60 | sigmoid | laparotomy |  |
| 2010 | Karsmakers et al.(51) |  | asymptomatic | 75 | 3 | NS | NS | bladder & vaginal wall | vaginal removal | lithiasis causing chronic kidney failure |
| 2015 | Kim et al.(52) |  | haematochezia | 53 | NS | NS | 60 | rectum | laparoscopy | partial colectomy |
| 2011 | Ko et al.(53) | 1 | haematuria and mictalgia | 50 | 4 | NS | 240 | bladder | cystoscopy | lithiasis |
|  |  | 2 | haematuria and mictalgia | 32 | 3 | NS | 72 | bladder | cystoscopy | lithiasis |
| 2014 | Lachiri et al.(54) |  | abdominal pain | 39 | 1 | Cu-IUD | 24 | small intestine & myometrium | laparotomy |  |
| 2010 | Lee et al.(55) |  | asymptomatic | 29 | 1 | Cu-IUD | 36 | colon | coloscopy |  |
| 2019 | Li et al.(56) |  | abdominal pain | 30 | 2 | NS | 60 | linker ureter | laparoscopy | hydronephrosis with need for nephrectomy |
| 2021 | Lin et al.(57) |  | haematuria | 51 | NS | Cu-IUD | 120 | bladder | laparoscopy |  |
| 2015 | Liu et al.(58) |  | haematuria and mictalgia | 35 | 1 | Cu-IUD | 120 | bladder | laparoscopy |  |
| 2014 | Loring et al.(59) |  | abdominal pain | 64 | NS | NS | 360 | omentum | laparoscopy |  |
| 2011 | Lykke et al.(60) |  | NS | NS | NS | NS | NS | sigmoid | laparoscopy + coloscopy |  |
| 2016 | Madden et al.(61) |  | abdominal pain & urinary complaints | 74 | 3 | NS | 504 | bladder & vaginal wall | cystoscopy + vaginal surgery | vesicovaginal fistula & lithiasis bladder |
| 2021 | Makary et al.(62) |  | recurrent cystitis | 32 | 1 | NS | 96 | bladder | cystoscopy | lithiasis |
| 2022 | Makni et al.(63) |  | abdominal pai | 45 | 3 | NS | 72 | sigmoid | coloscopy |  |
| 2022 | Maree et al.(64) |  | abdominal pain | 30 | NS | Cu-IUD | 3 | appendix | laparoscopy | appendectomy |
| 2022 | Mascilini et al.(65) |  | abdominal pain & vaginal blood loss | 45 | NS | NS | 24 | ileum | laparotomy |  |
| 2012 | McCombie et al.(66) |  | abdominal pain & tenesmus | 35 | NS | NS | 15 | rectum | coloscopy | multiple adhesions - IUD not removed |
| 2014 | Mitinunwong et al.(67) |  | asymptomatic | 63 | 6 | NS | NS | abdomen | laparoscopy | incidental finding during staging for endometrium carcinoma |
| 2015 | Murillo et al.(68) |  | abdominal pain & anal blood loss | 40 | NS | NS | 180 | rectum | coloscopy |  |
| 2013 | Nas et al.(69) |  | abdominal pain and urinary complaints | 48 | NS | NS | 120 | bladder | cystoscopy |  |
| 2017 | Neumann et al.(70) |  | asymptomatic | 30 | 1 | NS | 1,5 | omentum | laparoscopy |  |
| 2018 | Niu et al.(71) |  | suprapubic pain | 57 | 1 | Cu-IUD | 312 | bladder & uterus | hysteroscopy & cystoscopy |  |
| 2015 | Niu et al.(72) |  | asymptomatic | 29 | 2 | NS | NS | bladder & uterus | hysteroscopy |  |
| 2011 | Oraif et al.(73) |  | asymptomatic | 27 | NS | LNG-IUD | 6 | ileum | laparoscopy | multiple adhesions |
| 2014 | Ozgur et al.(74) |  | abdominal pain and urinary complaints | 38 | NS | NS | 180 | bladder | cystoscopy + laparoscopy | lithiasis |
| 2011 | Parelukar et al.(75) |  | abdominal pain and amenorrhea | 22 | 1 | Cu-IUD | 24 | ligamentum latum | laparoscopy | diagnosis during surgery for ectopic pregnancy |
| 2016 | Parent et al.(76) |  | menorrhagia & abdominal pain | 26 | NS | LNG-IUD | 9 | uterus | laparoscopy |  |
| 2013 | Peleg et al.(77) |  | abdominal pain | 26 | 4 | LNG-IUD | 42 | omentum | laparotomy | removal during pregnancy |
| 2019 | Peng et al.(78) |  | abdominal pain | 30 | NS | Cu-IUD | 48 | rectum | coloscopy |  |
| 2010 | Pereira et al.(79) |  | urinary complaints | 41 | NS | NS | 36 | bladder | cystoscopy | lithiasis |
| 2014 | Peterson et al.(80) |  | asymptomatic | 28 | 2 | Cu-IUD | 120 | bladder | cystoscopy | diagnosis after unplanned pregnancy |
| 2011 | Piras et al.(81) |  | haematuria and mictalgia | 45 | NS | NS | 168 | bladder | cystoscopy | lithiasis |
| 2017 | Ples et al.(82) |  | abdominal pain | 56 | NS | NS | 348 | terminal ileum | NS |  |
| 2021 | Pujol et al.(83) |  | urinary complaints | 37 | NS | NS | 180 | bladder | laparoscopy | partial cystectomy |
| 2009 | Rahman et al.(84) |  | asymptomatic | 55 | 8 | NS | NS | omentum | laparotomy |  |
| 2014 | Rahnemai-Azar et al.(85) |  | asymptomatic | 33 | 4 | NS | 1 | small intestine | laparotomy | partial resection ileum |
| 2021 | Rasyid et al.(86) |  | abdominal pain and dysuria | 30 | NS | Cu-IUD | 2 | bladder | cystoscopy | placement two months after caesarean section |
| 2009 | Ribeiro et al.(87) |  | abdominal pain | 24 | 3 | Cu-IUD | 18 | sigmoid | not removed |  |
| 2019 | Rosario et al.(88) |  | abdominal pain & fever | 34 | 4 | Cu-IUD | 2 | intraabdominal | laparoscopy | IUD in tuba-ovarian abscess |
| 2016 | Rovati et al.(89) |  | severe dysmenorrhea | 38 | NS | NS | 24 | right ovary | laparoscopy |  |
| 2022 | Sabbahi et al.(90) |  | asymptomatic | 47 | 3 | NS | 216 | stomach | laparoscopy |  |
| 2017 | Santos et al.(91) |  | asymptomatic | 32 | NS | NS | 72 | omentum | laparoscopy |  |
| 2018 | Scambia et al.(92) |  | vaginal blood loss | 64 | NS | NS | NS | vaginal wall | vaginal surgery | incidental finding during diagnosis of cervical cancer |
| 2010 | Sezer et al.(93) |  | asymptomatic | 62 | 2 | NS | 504 | abdomen | not removed | laparoscopy and laparotomy - IUD not found |
| 2010 | Shah et al.(94) |  | asymptomatic | 35 | NS | NS | NS | rectum | laparotomy |  |
| 2019 | Sliwa et al.(95) |  | asymptomatic | 41 | 2 | LNG-IUD | 3 | omentum | laparoscopy |  |
| 2008 | Sun et al.(96) |  | abdominal pain | 43 | 2 | NS | 240 | abdomen | laparoscopy | no adhesions |
| 2014 | Takahashi et al.(97) |  | asymptomatic | 35 | 2 | Cu-IUD | 72 | sigmoid | laparotomy | sigmoid resection |
| 2010 | Taras et al.(98) |  | abdominal pain & anal blood loss | 36 | NS | NS | 48 | sigmoid & uterus | laparoscopy |  |
| 2010 | Taves et al.(99) |  | tenesmus, abdominal pain, and diarrhoea | 38 | NS | NS | NS | sigmoid | laparotomy |  |
| 2018 | Thapa et al.(100) | 1 | abdominal pain | 41 | 2 | Cu-IUD | 0,25 | intra-abdominal | laparotomy |  |
|  |  | 2 | abdominal pain | 25 | 2 | Cu-IUD | 1 | intra-abdominal | laparoscopy |  |
|  |  | 3 | asymptomatic | 45 | 2 | Cu-IUD | 144 | NS | laparoscopy |  |
| 2009 | Thirumagal et al.(101) |  | asymptomatic | 39 | NS | LNG-IUD | 19 | omentum | laparotomy |  |
| 2013 | Toprak et al.(102) |  | asymptomatic | 32 | 2 | NS | 36 | rectum | coloscopy | unplanned pregnancy |
| 2016 | Torres-Cepeda et al.(103) |  | abdominal pain | 29 | NS | NS | 14 | ileum | laparoscopy |  |
| 2017 | Toumi et al.(104) |  | abdominal pain & irregular blood loss | 26 | NS | Cu-IUD | 24 | sigmoid | laparotomy | two IUDs found – pelvic abscess |
| 2009 | Vandaele et al.(105) |  | abdominal pain & anal blood loss | 44 | 2 | Cu-IUD | 31 | sigmoid | laparoscopy | IUD in deep endometriosis nodule, adhesion sigmoid and uterus |
| 2016 | Vinayachandran et al.(106) |  | asymptomatic | 30 |  | Cu-IUD | 36 | rectum | coloscopy |  |
| 2015 | Voulgaris et al.(107) |  | haematuria, mictalgia and abnormal vaginal blood loss | 30 | NS | NS | 12 | bladder | cystoscopy |  |
| 2010 | Vural et al.(108) |  | abdominal pain | 48 | 6 | NS | 180 | bladder | laparoscopy + cystoscopy |  |
| 2018 | Wang et al.(109) |  | asymptomatic | 58 | 6 | Cu-IUD | 240 | serosa sigmoid | laparoscopy |  |
| 2015 | Wang et al.(110) | 1 | abdominal pain | 39 | NS | NS | 144 | left ureter | laparoscopy | hydronephrosis left |
|  |  | 2 | mictalgia en haematuria | 25 | NS | NS | 24 | bladder | laparoscopy | lithiasis |
|  |  | 3 | asymptomatic | 41 | NS | NS | NS | right ureter | laparoscopy | hydronephrosis right |
| 2011 | Weng et al.(111) |  | anal blood loss during menstruation | 31 | 2 | NS | 48 | rectosigmoid | laparoscopy | suspected endometriosis |
| 2018 | Yan et al.(112) |  | abnormal vaginal discharge | 46 | 1 | Cu-IUD | 264 | rectovaginal space | hysteroscopy  + vaginal surgery |  |
| 2022 | Yang et al.(113) |  | asymptomatic | 42 | NS | NS | 216 | bladder & uterus | laparoscopy |  |
| 2017 | Yang et al.(114) |  | abdominal pain | 36 | 1 | NS | 144 | parametrium | laparoscopy | hydronephrosis left |
| 2018 | Ye et al.(115) |  | metal thread from anus | 45 |  | NS | NS | rectum | laparoscopy + coloscopy |  |
| 2019 | Zhang et al.(116) |  | dysuria and urgency | 38 | 1 | Cu-IUD | 132 | serosa uterus | NS | hysterectomy |
| 2021 | Zhao et al.(117) |  | abdominal pain | 31 | 2 | Cu-IUD | 132 | stomach | laparoscopy | partial gastrectomy |
| 2018 | Zhou et al.(118) |  | haematochezia | 37 | 1 | Cu-IUD | 24 | sigmoid & mesentery | laparoscopy |  |
|  |  |  |  |  |  |  |  |  |  |  |
| 2014 | Kho et al.(119) | 37 | 20 cases: pain  16 cases: asymptomatic  1 case: intestinal complaints | NS | NS | 19 cases Cu-IUD  17 cases  LNG IUD  1 case NS | NS | pelvic wall (10x)  Douglas (8x)  omentum (6x)  colon (2x)  sigmoid (3x)  rectum perforation (2x) | NS |  |

* NS: not specified

References:

1. Abasiattai AM, Umoiyoho AJ, Utuk NM, Ugege W, Udoh IA. Intrauterine contraceptive device with rectal perforation and strings presenting at the anus. Case Reports [Internet]. 2010 Jan 1 [cited 2024 Feb 22];2010:bcr0320102836. Available from: https://casereports.bmj.com/content/2010/bcr.03.2010.2836

2. Al Sahaf MA, Bseiso BF, Al-Momen SA, Meshikhes AWN. Endoscopic removal of an incidentally discovered intrauterine contraceptive device eroding into the rectum. BMJ Case Reports CP [Internet]. 2019 Sep 1 [cited 2024 Feb 22];12(9):e231410. Available from: https://casereports.bmj.com/content/12/9/e231410

3. Aliukonis V, Lasinskas M, Pilvelis A, Gradauskas A. Intrauterine device migration into the lumen of large bowel: A case report. Int J Surg Case Rep. 2020 Jan 1;72:306–8.

4. An Y, Liu C, Mao F, Yang G, Mao G. Intrauterine device found in an ovarian tumor: A case report. Medicine (United States) [Internet]. 2020 Oct 16 [cited 2024 Feb 22];99(42). Available from: https://journals.lww.com/md-journal/fulltext/2020/10160/intrauterine_device_found_in_an_ovarian_tumor__a.95.aspx

5. Badu-Peprah A, Adu-Bredu TK, Adu-Takyi C. The role of multimodality radiological imaging in extrauterine misplaced IUCD: A case report. Afr J Reprod Health [Internet]. 2020 [cited 2024 Feb 22];24(4):213–7. Available from: https://pubmed.ncbi.nlm.nih.gov/34077085/

6. Banerjee J, Jeelani R, Berman JM, Diamond MP. Missing IUD and utilization of fluoroscopy for management: A case report. Contraception [Internet]. 2012 Sep 1 [cited 2024 Feb 22];86(3):285–7. Available from: http://www.contraceptionjournal.org/article/S0010782411007359/fulltext

7. Behtash N, Akhavan S, Mokhtar S. Pelvic Mass Due to Transmigrated IUD. Acta Med Iran [Internet]. 2010 [cited 2024 Feb 22];48(2):125–6. Available from: https://acta.tums.ac.ir/index.php/acta/article/view/3663

8. Benaguida H, Kiram H, Telmoudi EC, Ouafidi B, Benhessou M, Ennachit M, et al. Intraperitoneal migration of an intrauterine device (IUD): A case report. Ann Med Surg (Lond) [Internet]. 2021 Aug 1 [cited 2024 Feb 22];68. Available from: https://pubmed.ncbi.nlm.nih.gov/34295465/

9. Bitterman A, Lefel O, Segev Y, Lavie O. Laparoscopic Removal of an Intrauterine Device Following Colon Perforation. JSLS [Internet]. 2010 Jul [cited 2024 Feb 22];14(3):456. Available from: /pmc/articles/PMC3041053/

10. Boushehry R, Al-Taweel T, Bandar A, Hasan M, Atnuos M, Alkhamis A. Rare case of rectal perforation by an intrauterine device: Case report and review of the literature. Int J Surg Case Rep. 2022 Oct 1;99:107610.

11. Bouzouba W, Fdili Alaoui FZ, Jayi S, Bouguern H, Abdelilah Melhouf M. Migration intra-péritonéal d’un dispositif intra utérin diagnostiqué 20 ans après l’insertion: à propos d’un cas. PAMJ 2014; 17:7 [Internet]. 2014 [cited 2024 Feb 22];17(7). Available from: https://www.panafrican-med-journal.com/content/article/17/7/full

12. Bozkurt M, Yumru AE, Coskun EI, Öndes B. Laparoscopic management of a translocated intrauterine device embedded in the gastric serosa. J Pak Med Assoc [Internet]. 2011 Oct 1 [cited 2024 Feb 22];61(10):1020–2. Available from: https://europepmc.org/article/med/22356042

13. Campobasso D, Ciuffreda M, Maestroni U, Dinale F cesco, Frattini A, Ferretti S, et al. Laparoscopic Removal of an Intrauterine Contraceptive Device Migrated into the Bladder: A Case Report. Urol J [Internet]. 2014 Sep 6 [cited 2024 Feb 22];11(4):1847–8. Available from: https://journals.sbmu.ac.ir/urolj/index.php/uj/article/view/2399

14. Carmody K, Schwartz B, Chang A. Extrauterine Migration of a Mirena® Intrauterine Device: A Case Report. J Emerg Med. 2011 Aug 1;41(2):161–5.

15. Chai W, Zhang W, Jia G, Cui M, Cui L. Vesical transmigration of an intrauterine contraceptive device. Medicine (United States) [Internet]. 2017 Oct 1 [cited 2024 Feb 22];96(40). Available from: https://journals.lww.com/md-journal/fulltext/2017/10060/vesical_transmigration_of_an_intrauterine.32.aspx

16. Chakir Y, Daghdagh Y, Moataz A, Dakir M, Debbagh A, Aboutaieb R. Intra uterine device migrating into the bladder with stone formation. Urol Case Rep. 2022 Jan 1;40:101918.

17. Chen PH, Hsien-Liu, Lee SL, Chang CY, Chang CC. Pneumoperitoneum caused by perforation of pyometra associated with a lost intrauterine device and perforated malignancy of the sigmoid colon. Taiwan J Obstet Gynecol. 2011 Mar 1;50(1):124–5.

18. Christodoulides AP, Karaolides T. Intravesical Migration of an Intrauterine Device (IUD)-Case Report. Urology [Internet]. 2020 May 1 [cited 2024 Feb 22];139:14–7. Available from: http://www.goldjournal.net/article/S0090429520301862/fulltext

19. Chuang YT, Yang WJ, Lee RKK, Hwu YM. Laparoscopic Removal of a Migrated Intrauterine Contraceptive Device With Bladder Penetration. Taiwan J Obstet Gynecol. 2010 Dec 1;49(4):518–20.

20. Clancy AA, Gerridzen R, Pascali D. Intrauterine device visualized as extrinsic bladder mass on cystoscopy. Int Urogynecol J [Internet]. 2017 Sep 1 [cited 2024 Feb 22];28(9):1429–30. Available from: https://link.springer.com/article/10.1007/s00192-017-3382-8

21. Dappa E, Ramos R, Cunha TM, Ramos N, Silva E. Intrauterine device migration into the bladder with stone formation after radiochemotherapy for cervical cancer: a case report. J Obstet Gynaecol (Lahore) [Internet]. 2020 Nov 16 [cited 2024 Feb 22];40(8):1166–8. Available from: https://www.tandfonline.com/doi/abs/10.1080/01443615.2019.1693524

22. Dar LA, Khan PS, Mushtaque M. Giant calculus formation after migration of an intrauterine device into the urinary bladder. International Journal of Gynecology & Obstetrics [Internet]. 2011 Jun 1 [cited 2024 Feb 22];113(3):243–243. Available from: https://onlinelibrary.wiley.com/doi/full/10.1016/j.ijgo.2011.01.004

23. Delotte J, Trastour C, Bafghi A, Iannelli A, Bongain A. Un motif de consultation surprenant : la perception de fils sortant par l’anus: À propos d’une complication rare de la pose de DIU. J Gynecol Obstet Biol Reprod (Paris). 2006 Dec 1;35(8):820–1.

24. Derrick BJ, Jafri FN, Saul T, Lewiss RE. Perforated uterus with displacement of intrauterine device. Journal of Emergency Medicine [Internet]. 2013 Jun 1 [cited 2024 Feb 22];44(6):1144–5. Available from: http://www.jem-journal.com/article/S0736467912014618/fulltext

25. Dispositivo intrauterino en cavidad rectal [Internet]. [cited 2024 Feb 22]. Available from: https://scielo.isciii.es/scielo.php?pid=S1130-01082017000400013&script=sci_arttext&tlng=es

26. Usikker diagnostik med ultralydskanning ved fejlplaceret spiral | Ugeskriftet.dk [Internet]. [cited 2024 Feb 22]. Available from: https://ugeskriftet.dk/videnskab/usikker-diagnostik-med-ultralydskanning-ved-fejlplaceret-spiral

27. Eichengreen C, Landwehr H, Goldthwaite L, Tocce K. Rectal perforation with an intrauterine device: A case report. Contraception [Internet]. 2015 Mar 1 [cited 2024 Feb 22];91(3):261–3. Available from: http://www.contraceptionjournal.org/article/S0010782414007914/fulltext

28. TRANSMIGRATION OF INTRA-UTERINE DEVICE, EXPLORATORY LAPAROTOMY, RETRIEVAL AND REPAIR OF PERFORATED UTERUS - PubMed [Internet]. [cited 2024 Feb 22]. Available from: https://pubmed.ncbi.nlm.nih.gov/27487601/

29. Erian M, Mclaren G, Baartz D. The Wandering Mirena: Laparoscopic Retrieval. JSLS [Internet]. 2011 Jan [cited 2024 Feb 22];15(1):127. Available from: /pmc/articles/PMC3134688/

30. [Migration intravésicale d’un dispositif intra-utérin Cas clinique et revue de la littérature] - PubMed [Internet]. [cited 2024 Feb 22]. Available from: https://pubmed.ncbi.nlm.nih.gov/29845850/

31. Ferguson CA, Costescu D, Jamieson MA, Jong L. Transmural migration and perforation of a levonorgestrel intrauterine system: A case report and review of the literature. Contraception [Internet]. 2016 Jan 1 [cited 2024 Feb 22];93(1):81–6. Available from: http://www.contraceptionjournal.org/article/S0010782415005764/fulltext

32. Foda AA. A rare site of intrauterine contraceptive device migration. European Journal of Obstetrics and Gynecology and Reproductive Biology [Internet]. 2016 Mar 1 [cited 2024 Feb 22];198:172–3. Available from: http://www.ejog.org/article/S0301211515004509/fulltext

33. Ghayouri S, Garg N, Sisto J, Pedroso J. Vesicular Migration of Copper-laden Intrauterine Device Causing Chronic Pelvic Pain. J Minim Invasive Gynecol [Internet]. 2018 Nov 1 [cited 2024 Feb 22];25(7):S177–8. Available from: http://www.jmig.org/article/S155346501830966X/fulltext

34. Giampaolino P, Della Corte L, Di Spiezio Sardo A, Zizolfi B, Manzi A, De Angelis C, et al. Emergent Laparoscopic Removal of a Perforating Intrauterine Device During Pregnancy Under Regional Anesthesia. J Minim Invasive Gynecol [Internet]. 2019 Sep 1 [cited 2024 Feb 22];26(6):1013–4. Available from: http://www.jmig.org/article/S1553465019301347/fulltext

35. Glass T, Baker T, Kauffman RP. Migration of an Intrauterine Contraceptive Device during the Course of Pregnancy: A Case Report. J Minim Invasive Gynecol [Internet]. 2009 Jan 1 [cited 2024 Feb 22];16(1):81–3. Available from: http://www.jmig.org/article/S1553465008009795/fulltext

36. Goldbach AR, Hava S, Patel H, Khan M. IUD embedment in the fallopian tube: An unexpected location for a translocated IUD. Radiol Case Rep. 2018 Aug 1;13(4):788–92.

37. Gonenc M, Kalayci MU, Turhan AN, Deniztas C, Alis H. Endoscopic treatment of a transmigrated intrauterine device to colonic wall: A case report. Am J Obstet Gynecol [Internet]. 2011 Mar 1 [cited 2024 Feb 22];204(3):e3. Available from: http://www.ajog.org/article/S0002937810023173/fulltext

38. Güngör M, Sönmezer M, Atabekoglu C, Ortaç F. Laparoscopic Management of a Translocated Intrauterine Device Perforating the Bowel. J Am Assoc Gynecol Laparosc. 2003 Nov 1;10(4):539–41.

39. Haouas N, Sahraoui W, Youssef A, Thabet I, Mosbah AT. Migration intra-vésicale de dispositif intra-utérin compliquée de lithiase. J Gynecol Obstet Biol Reprod (Paris). 2006 May 1;35(3):288–92.

40. Hewson J. A rollercoaster ride. Journal of Family Planning and Reproductive Health Care [Internet]. 2011 Oct 1 [cited 2024 Feb 24];37(4):255–6. Available from: https://srh.bmj.com/content/37/4/255.3

41. Hick EJ, Hernández J, Yordán R, Morey AF, Avilés R, García CR. BLADDER CALCULUS RESULTING FROM THE MIGRATION OF AN INTRAUTERINE CONTRACEPTIVE DEVICE. J Urol [Internet]. 2004 [cited 2024 Feb 24];172(5 I):1903. Available from: https://www.auajournals.org/doi/10.1097/01.ju.0000142135.94531.bb

42. Een vrouw met buikpijn na insertie van een spiraaltje | NTvG [Internet]. [cited 2024 Feb 24]. Available from: https://www.ntvg.nl/artikelen/een-vrouw-met-buikpijn-na-insertie-van-een-spiraaltje

43. Huang X, Zhong R, Zeng L, He X, Deng Q, Peng X, et al. Chronic nodules of sigmoid perforation caused by incarcerated intrauterine contraception device. Medicine (United States) [Internet]. 2019 Jan 1 [cited 2024 Feb 24];98(4). Available from: https://journals.lww.com/md-journal/fulltext/2019/01250/chronic_nodules_of_sigmoid_perforation_caused_by.22.aspx

44. Huertas-Velasco MA, Gómez-Rubio M. Endoscopic removal of intrauterine device penetrated through the rectal wall. Revista Española de Enfermedades Digestivas [Internet]. 2012 [cited 2024 Feb 24];104(8):432–3. Available from: https://scielo.isciii.es/scielo.php?script=sci_arttext&pid=S1130-01082012000800007&lng=en&nrm=iso&tlng=en

45. Istanbulluoglu MO, Ozcimen EE, Ozturk B, Uckuyu A, Cicek T, Gonen M. Bladder perforation related to intrauterine device. Journal of the Chinese Medical Association [Internet]. 2008 [cited 2024 Feb 24];71(4):207–9. Available from: https://journals.lww.com/jcma/fulltext/2008/04000/bladder_perforation_related_to_intrauterine_device.8.aspx

46. Insausti Jaca N, Urresola Olabarrieta A, Ibáñez S, Atilano Santos L, Aguinaga Alexanco A, Larrea Bilbao L. Perforación útero-vesical secundaria a un dispositivo intrauterino con formación de litiasis vesical: a propósito de dos casos. Radiologia. 2007 Mar 1;49(2):129–32.

47. Intravesical migration of a failed and forgotten intrauterine contraceptive device after 20 years of insertion--a case report - PubMed [Internet]. [cited 2024 Feb 24]. Available from: https://pubmed.ncbi.nlm.nih.gov/23175904/

48. Jievaltienė G, Surgontaitė D, Aniulienė R, Venskutonis D. Intrauterine device penetrating the anterior urinary bladder wall discovered during caesarean section: a case report. J Obstet Gynaecol (Lahore) [Internet]. 2020 Jul 3 [cited 2024 Feb 24];40(5):718–20. Available from: https://www.tandfonline.com/doi/abs/10.1080/01443615.2019.1637404

49. Jones D. Young woman with abdominal pain. Ann Emerg Med [Internet]. 2014 Oct 1 [cited 2024 Feb 24];64(4):423+425. Available from: http://www.annemergmed.com/article/S0196064414000869/fulltext

50. Transmigration of an intrauterine device into sigmoid colon-surgical management: A case report - PubMed [Internet]. [cited 2024 Feb 24]. Available from: https://pubmed.ncbi.nlm.nih.gov/30410158/

51. Karsmakers R, Weis-Potters AE, Buijs G, Joustra EB. Chronic kidney disease after vesico-vaginal stone formation around a migrated intrauterine device. Case Reports [Internet]. 2010 Jan 1 [cited 2024 Feb 24];2010:bcr1220092547. Available from: https://casereports.bmj.com/content/2010/bcr.12.2009.2547

52. Kim TH, Lee HH, Chung SH, Jeon DS. Hematochezia caused by intrauterine device perforation. Contraception [Internet]. 2015 May 1 [cited 2024 Feb 24];91(5):430. Available from: http://www.contraceptionjournal.org/article/S0010782415000414/fulltext

53. Ko PC, Lin YH, Lo TS. Intrauterine Contraceptive Device Migration to the Lower Urinary Tract: Report of 2 Cases. J Minim Invasive Gynecol [Internet]. 2011 Sep 1 [cited 2024 Feb 24];18(5):668–70. Available from: http://www.jmig.org/article/S1553465011002494/fulltext

54. Lachiri B, Hafidi MR achid, Zazi A, Fagouri H, Kouach J, Rahali DM oussaoui, et al. Le stérilet migrateur : à propos de deux cas et revue de la littérature. PAMJ 2014; 19:361 [Internet]. 2014 [cited 2024 Feb 24];19(361):361. Available from: https://www.panafrican-med-journal.com/content/article/19/361/full

55. Lee JE, Park KS, Kim ES, Cho KB, Shin SJ, Cho CH, et al. Removal of a lost intrauterine device by colonoscopy after a successful full-term delivery (with video). Gastrointest Endosc [Internet]. 2010 Oct 1 [cited 2024 Feb 24];72(4):898–900. Available from: http://www.giejournal.org/article/S0016510710000738/fulltext

56. Li X, Li H, Li C, Luo X, Song Y, Li S, et al. Migration of an intrauterine device causing severe hydronephrosis progressing to renal failure A case report. Medicine (United States) [Internet]. 2019 [cited 2024 Feb 24];98(3). Available from: https://journals.lww.com/md-journal/fulltext/2019/01180/migration_of_an_intrauterine_device_causing_severe.7.aspx

57. Lin PL, Wang YL, Weng SS, Huang WC. Laparoscopic Repair of the Bladder: A Case of Intrauterine Device Migration to the Urinary Bladder. J Minim Invasive Gynecol [Internet]. 2021 Aug 1 [cited 2024 Feb 24];28(8):1433–5. Available from: http://www.jmig.org/article/S1553465021000765/fulltext

58. Liu L, Liu H, Zhang X. Intravesical migration of a Chinese intrauterine device and secondary stone formation: diagnostic investigation and laparoscopic management. Int Urogynecol J [Internet]. 2015 Nov 1 [cited 2024 Feb 24];26(11):1715–6. Available from: https://link.springer.com/article/10.1007/s00192-015-2735-4

59. Loring M, Isaacson KB. Intra-abdominal Dalkon Shield IUD: Lost for over 30 years. J Minim Invasive Gynecol [Internet]. 2015 Jan 1 [cited 2024 Feb 24];22(1):4–5. Available from: http://www.jmig.org/article/S1553465014001460/fulltext

60. [Transrectal removal of displaced intrauterine device] - PubMed [Internet]. [cited 2024 Feb 24]. Available from: https://pubmed.ncbi.nlm.nih.gov/21936982/

61. Madden A, Aslam A, Nusrat NB. A Case of Migrating “Saf-T-Coil” Presenting With a Vesicovaginal Fistula and Vesicovaginal Calculus. Urol Case Rep. 2016 Jul 1;7:17–9.

62. Makary J, Rathore P. Lost and forgotten: A case of intravesical migration of an intrauterine device. Urol Case Rep. 2021 Nov 1;39:101841.

63. Makni C, Souissi S, Saidani A, Belhaj A, Bousnina O, Ammar LB, et al. Retrait endoscopique d´un dispositif intra-utérin perforant le côlon sigmoïde: à propos d´un cas. PAMJ 2022; 42:175 [Internet]. 2022 Jul 5 [cited 2024 Feb 24];42(175). Available from: https://www.panafrican-med-journal.com/content/article/42/175/full

64. Maree G, Mohammad S, Saleh R, Hoshma A, Makhluf H. Appendiceal perforation caused by an intrauterine contraceptive device: A case report. Case Rep Womens Health. 2022 Oct 1;36:e00447.

65. Mascilini F, Moro F, De Leo R, Scambia G, Fagotti A, Testa AC. Intraoperative ultrasound assistance for surgical removal of lost intrauterine device. Ultrasound in Obstetrics & Gynecology [Internet]. 2019 May 1 [cited 2024 Feb 24];53(5):705–6. Available from: https://onlinelibrary.wiley.com/doi/full/10.1002/uog.19167

66. Mccombie JJ, Le Fur R. Colonoscopic removal of an ectopic intrauterine device. ANZ J Surg [Internet]. 2012 May 1 [cited 2024 Feb 24];82(5):369–70. Available from: https://onlinelibrary.wiley.com/doi/full/10.1111/j.1445-2197.2012.06031.x

67. Mitinunwong C, Huang KG, Thepsuwan J, Chua AAA, Yantapant A. Forgotten intrauterine device wandering in the abdomen of an endometrial cancer patient. Gynecol Minim Invasive Ther. 2014 Feb 1;3(1):26–7.

68. Alonso Murillo L, Marcacuzco Quinto AA, Manrique Municio A, Bermello Meza CF, Justo Alonso I, Jiménez Romero LC. Migración rectal de dispositivo intrauterino. Clin Invest Ginecol Obstet. 2016 Sep 1;43(4):187–9.

69. S57 Intravesical migration of an intrauterine device - ScienceDirect [Internet]. [cited 2024 Feb 24]. Available from: https://www.sciencedirect.com/science/article/abs/pii/S1569905613620904?via%3Dihub

70. Neumann DA, Graversen JA, Pugh SK. Intrauterine device embedded in omentum of postpartum patient with a markedly retroverted uterus: A case report. J Med Case Rep [Internet]. 2017 Oct 25 [cited 2024 Feb 24];11(1):1–4. Available from: https://jmedicalcasereports.biomedcentral.com/articles/10.1186/s13256-017-1480-3

71. Niu H, Zhang L, Yao S, Qu Q. Successful removal of an intrauterine device perforating the uterus and the bladder with the aid of a transurethral nephroscope. Int Urogynecol J [Internet]. 2019 Feb 4 [cited 2024 Feb 24];30(2):325–6. Available from: https://link.springer.com/article/10.1007/s00192-018-3746-8

72. Niu H, Qu Q, Yang X, Zhang L. Partial Perforation of the Bladder by an Intrauterine Device in a Pregnant Woman: A Case Report. J Reprod Med [Internet]. 2015 Nov 1 [cited 2024 Feb 24];60(11–12):543–6. Available from: https://europepmc.org/article/med/26775465

73. Oraif A, Awadalla A. Intrauterine Device Embedded in the Mesentery of the Small Bowel. Journal of Obstetrics and Gynaecology Canada. 2011 Oct 1;33(10):987.

74. Ozgur BC, Doluoglu OG, Sarici H, Sunay MM, Karagoz MA, Eroglu M. S277: Intrauterine device migration to two different localizations resulting in bladder stone and carrying the risk of vesicovaginal fistula. European Urology Supplements. 2014 Nov 1;13(7):e1591.

75. Parulekar S V. Face to face: Misplaced intrauterine device and abdominal ectopic pregnancy. J Postgrad Med [Internet]. 2011 Jul [cited 2024 Feb 24];57(3):223–4. Available from: https://journals.lww.com/jopm/fulltext/2011/57030/face_to_face__misplaced_intrauterine_device_and.12.aspx

76. Parent S, Binette A, Bureau YA. Migration of an Intrauterine System. Journal of Obstetrics and Gynaecology Canada [Internet]. 2016 Nov 1 [cited 2024 Feb 24];38(11):997. Available from: http://www.jogc.com/article/S1701216316394798/fulltext

77. Peleg D, Latta R. Removal of an intraabdominal levonorgestrel-releasing intrauterine device during pregnancy. Am J Obstet Gynecol [Internet]. 2013 Jun 1 [cited 2024 Feb 24];208(6):e4. Available from: http://www.ajog.org/article/S0002937813002366/fulltext

78. Peng L, Wei S, Li X, Jin D, Sang H, Dai H, et al. Endoscopic removal of a migrated intrauterine contraceptive device in the rectum assisted by Overstitch defect closure. Endoscopy [Internet]. 2019 [cited 2024 Feb 24];51(10):E276–7. Available from: http://www.thieme-connect.com/products/ejournals/html/10.1055/a-0884-2832

79. Jorge Pereira B, Retroz E, Brandõ Á, Coelho H, Borges R, Leaõ R, et al. UP-2.01: Endoscopic removal of spontaneously migrated IUD to the bladder. Urology [Internet]. 2010 Sep 1 [cited 2024 Feb 24];76(3):S80. Available from: http://www.goldjournal.net/article/S0090429510011878/fulltext

80. Peterson AT, Luongo T, Ferzandi TR. Intrauterine Device (IUD) Perforation and Cystoscopic Removal. J Minim Invasive Gynecol [Internet]. 2014 Mar 1 [cited 2024 Feb 24];21(2):S48. Available from: http://www.jmig.org/article/S1553465013015185/fulltext

81. Piras D, Pedalino M, Di Primio O, Vella R, Cagnazzi E, Marino G. A Case of Intravesical Migration of an Intrauterine Device Detected 14 Years Later. https://doi.org/105301/RU20118767 [Internet]. 2011 Jul 11 [cited 2024 Feb 24];78 Suppl 18:45–8. Available from: https://journals.sagepub.com/doi/10.5301/RU.2011.8767

82. An intrauterine contraceptive device: where did we find it after 29 years of insertion? A case report - PubMed [Internet]. [cited 2024 Feb 24]. Available from: https://pubmed.ncbi.nlm.nih.gov/28065971/

83. Polanco Pujol L, Rodríguez Fernández E, Bueno Chomón G, Caño Velasco J, Quintana Álvarez R, Cancho Gil MJ, et al. Intravesical migration of intrauterine device. Actas Urológicas Españolas (English Edition). 2021 Jan 1;45(1):90–1.

84. JPMA - Journal Of Pakistan Medical Association [Internet]. [cited 2024 Feb 24]. Available from: https://jpma.org.pk/article-details/1680?article_id=1680

85. Rahnemai-Azar AA, Apfel T, Naghshizadian R, Cosgrove JM, Farkas DT. Laparoscopic Removal of Migrated Intrauterine Device Embedded in Intestine. JSLS [Internet]. 2014 [cited 2024 Feb 24];18(3). Available from: /pmc/articles/PMC4236077/

86. Rasyid N, Nainggolan HJ, Jonardi PA, Raharja PAR, Wiweko B, Atmoko W, et al. Early-onset complete spontaneous migration of contraceptive intrauterine device to the bladder in a post C-section patient: A case report. Int J Surg Case Rep. 2021 May 1;82:105850.

87. Ribeiro SC, Vanni DGBS, Tormena RA, Pereira CLM, Bitran A, Baracat EC. Transmigration of an intrauterine device to the colon wall. International Journal of Gynecology & Obstetrics [Internet]. 2009 Nov 1 [cited 2024 Feb 24];107(2):153–4. Available from: https://onlinelibrary.wiley.com/doi/full/10.1016/j.ijgo.2009.06.012

88. Pinto Rosario D, Kulkarni N, Vigueras Smith A, Sumak R, Ferreira H. 2469 Perforated Copper-T Causing an Ovarian Abscess: The First Reported Case. J Minim Invasive Gynecol [Internet]. 2019 Nov 1 [cited 2024 Feb 24];26(7):S130. Available from: http://www.jmig.org/article/S1553465019305874/fulltext

89. Rovati M, Raveglia F, Baisi A, De Simone M, Cioffi U. Ovarian transmigration of intrauterine device. Journal of Obstetrics and Gynaecology Research [Internet]. 2016 Dec 1 [cited 2024 Feb 24];42(12):1889–90. Available from: https://onlinelibrary.wiley.com/doi/full/10.1111/jog.13120

90. Sabbahi RA, Batayyah ES, Sabbahi AA. A 47-Year-Old Woman with Gastric Transmigration of an Intrauterine Contraceptive Device Managed by Laparoscopic Wedge Gastric Resection. Am J Case Rep [Internet]. 2021 [cited 2024 Feb 24];22(1):e929469-1-e929469-4. Available from: https://pubmed.ncbi.nlm.nih.gov/33608493/

91. Santos AP, Wetzel C, Siddiqui Z, Harper DS. Laparoscopic removal of migrated intrauterine device. Case Reports [Internet]. 2017 Sep 27 [cited 2024 Feb 24];2017:bcr-2017-221342. Available from: https://casereports.bmj.com/content/2017/bcr-2017-221342

92. Scambia JR, Lombardo L, Wille MA, Vidal P, Hollowell CMP, Beck TP. Calcified retained intrauterine device in the setting of a vesicovaginal fistula. Urol Case Rep. 2018 Mar 1;17:106–8.

93. Sezer SD, Odabaşi ARO, Küçük MK, Yüksel HY. Lost intrauterine contraceptive device inserted 42 years before: a case report. Clinical and Experimental Obstetrics & Gynecology 2011, 38(1), 90-93 [Internet]. 2011 Mar 10 [cited 2024 Feb 24];38(1):90–3. Available from: https://www.imrpress.com/journal/CEOG/38/1/pii/1630488485079-800055310

94. Rare presentation of an intrauterine device migration into the rectum - PubMed [Internet]. [cited 2024 Feb 24]. Available from: https://pubmed.ncbi.nlm.nih.gov/21352682/

95. Sliwa J, Fuchs T, Kryza-Ottou A, Zimmer M. Laparoscopic treatment of an intrauterine device mislocated in the abdominal region. Ginekol Pol [Internet]. 2019 [cited 2024 Feb 24];90(8):490–490. Available from: https://journals.viamedica.pl/ginekologia_polska/article/view/GP.2019.0084

96. Sun CC, Chang CC, Yu MH. Far-migrated Intra-abdominal Intrauterine Device with Abdominal Pain. Taiwan J Obstet Gynecol. 2008 Jun 1;47(2):244–6.

97. Takahashi H, Lcdr ;, Puttler KM, Usn MC, Cdr ;, Hong C. Sigmoid Colon Penetration by an Intrauterine Device: A Case Report and Literature Review. Mil Med [Internet]. 2014 Jan 1 [cited 2024 Feb 24];179(1):e127–9. Available from: https://dx.doi.org/10.7205/MILMED-D-13-00268

98. Taras AR, Kaufman JA. Laparoscopic Retrieval of Intrauterine Device Perforating the Sigmoid Colon. JSLS [Internet]. 2010 Jul [cited 2024 Feb 24];14(3):453. Available from: /pmc/articles/PMC3041052/

99. Taves DH, Sorsdahl AK, Jadd JL, Chong JJR. Case of the month #167: Intrauterine contraceptive device migration to the descending sigmoid colon after uterine perforation. Canadian Association of Radiologists Journal [Internet]. 2010 Dec 1 [cited 2024 Feb 24];61(5):299–301. Available from: https://journals.sagepub.com/doi/10.1016/j.carj.2009.12.001

100. Missing Intrauterine Device Copper-T: Case Series - PubMed [Internet]. [cited 2024 Feb 24]. Available from: https://pubmed.ncbi.nlm.nih.gov/30455500/

101. Thirumagal B, Baker L, Shahid J. P709 Management of asymptomatic migration of Mirena-levonorgestrel-releasing intrauterine system: A case report. International Journal of Gynecology & Obstetrics [Internet]. 2009 Oct [cited 2024 Feb 24];107(S2):S616–S616. Available from: https://onlinelibrary.wiley.com/doi/full/10.1016/S0020-7292%2809%2962200-1

102. Toprak E, Göktürk HS, Tolu A. A new technique for the removal of a transmigrated intrauterine device with rectum penetration. Turkish Journal of Gastroenterology [Internet]. 2015 Jan 1 [cited 2024 Feb 24];26(1):82–4. Available from: http://turkjgastroenterol.org/en/a-new-technique-for-the-removal-of-a-transmigrated-intrauterine-device-with-rectum-penetration-134513

103. Torres-Cepeda D, Reyna-Villasmil E. Perforación del intestino delgado por dispositivo intrauterino. Gastroenterol Hepatol [Internet]. 2016 Aug 1 [cited 2024 Feb 24];39(7):495–6. Available from: https://www.elsevier.es/es-revista-gastroenterologia-hepatologia-14-articulo-perforacion-del-intestino-delgado-por-S0210570516000169

104. Toumi O, Ammar H, Ghdira A, Chhaidar A, Trimech W, Gupta R, et al. Pelvic abscess complicating sigmoid colon perforation by migrating intrauterine device: A case report and review of the literature. Int J Surg Case Rep. 2018 Jan 1;42:60–3.

105. Vandaele N, Iwanicki-Caron I, Piat M, Hervé S, Ducrotté P. Translocation of an intra-uterine contraceptive device with sigmoid penetration through an endometriosic nodule. Gastroenterol Clin Biol. 2009 Jun 1;33(6–7):488–90.

106. Nair KV. Endoscopic removal of an IUCD migrated into the rectum. American Journal of Gastroenterology [Internet]. 2016 Mar 1 [cited 2024 Feb 24];111(3):309. Available from: https://journals.lww.com/ajg/fulltext/2016/03000/endoscopic_removal_of_an_iucd_migrated_into_the.5.aspx

107. The case of the migrating IUD - PubMed [Internet]. [cited 2024 Feb 24]. Available from: https://pubmed.ncbi.nlm.nih.gov/26882776/

108. Vural M, Toy H, Camuzcuoglu H, Sezgin B. Lost IUD penetrating bladder wall. Journal of Family Planning and Reproductive Health Care [Internet]. 2010 [cited 2024 Feb 24];36(4):255. Available from: https://www.researchgate.net/publication/47741905_Lost_IUD_penetrating_bladder_wall

109. Wang L, Li Y, Zhao XP, Zhang WH, Bai W, He YG. Hydronephrosis caused by intrauterine contraceptive device migration: Three case reports with literature review. Clin Exp Obstet Gynecol [Internet]. 2017 Apr 10 [cited 2024 Feb 24];44(2):301–4. Available from: https://www.imrpress.com/journal/CEOG/44/2/10.12891/ceog3444.2017

110. Wang YC, Wasinghon P, Huang KG. Laparoscopic Removal of Migration of a Chinese Ring Intrauterine Device. J Minim Invasive Gynecol [Internet]. 2019 Feb 1 [cited 2024 Feb 24];26(2):344–5. Available from: http://www.jmig.org/article/S1553465018302152/fulltext

111. Weng SF, Chen HS, Chen YH, Lee JN, Tsai EM. Rectum penetration that was caused by the displacement of an intrauterine device and mimicked rectal endometriosis. Taiwan J Obstet Gynecol. 2011 Sep 1;50(3):375–6.

112. Yan D, Shi Z, Wang L, Zhao X. Migration of a fractured ring IUD resulting in vesicovaginal fistula and vaginal calculus. The European Journal of Contraception & Reproductive Health Care [Internet]. 2018 Sep 3 [cited 2024 Feb 24];23(5):387–9. Available from: https://www.tandfonline.com/doi/abs/10.1080/13625187.2018.1517409

113. Yang H, Yang M, Zi D, Duan K, Fu K, Guan X. Single-incision laparoscopic surgery for removal of ectopic intrauterine devices with bladder repair. Asian J Surg. 2021 Jan 1;44(1):401.

114. Yang X, Duan X, Wu T. Ureteric Obstruction Caused by a Migrated Intrauterine Device. Urol Case Rep. 2017 Jan 1;10:33–5.

115. Ye H, Huang S, Zhou Q, Yu J, Xi C, Cao L, et al. Migration of a foreign body to the rectum A case report and literature review. Medicine (United States) [Internet]. 2018 Jul 1 [cited 2024 Feb 24];97(28). Available from: https://journals.lww.com/md-journal/fulltext/2018/07130/migration_of_a_foreign_body_to_the_rectum__a_case.70.aspx

116. Zhang P, Wang T, Yang L. Extensive intravesical benign hyperplasia induced by an extravesical migrated intrauterine device: A case report. Medicine (United States) [Internet]. 2019 May 1 [cited 2024 Feb 24];98(20). Available from: https://journals.lww.com/md-journal/fulltext/2019/05170/extensive_intravesical_benign_hyperplasia_induced.71.aspx

117. Zhao Z, Zhang G, Peng P, Li X. Penetration of the gastric wall by an intrauterine device: a case report. Contraception [Internet]. 2021 Apr 1 [cited 2024 Feb 24];103(4):282–3. Available from: http://www.contraceptionjournal.org/article/S0010782421000081/fulltext

118. Zhou XX, Yu MS, Gu ML, Zhong WX, Wu HR, Ji F, et al. Sigmoid colon translocation of an intrauterine device misdiagnosed as a colonic polyp: A case report. Medicine (United States) [Internet]. 2018 Feb 1 [cited 2024 Feb 24];97(6). Available from: https://journals.lww.com/md-journal/fulltext/2018/02090/sigmoid_colon_translocation_of_an_intrauterine.32.aspx

119. Kho KA, Dina MPH, Chamsy J. Perforated Intraperitoneal Intrauterine Contraceptive Devices: Diagnosis, Management and Clinical Outcomes HHS Public Access. J Minim Invasive Gynecol. 2014;21(4):596–601.
